# Supplementary material
Source: publisher site journal article supplement (https://www.dovepress.com/article/325499)
Supplement: Supplementary file 1 [file get_supplementary_file.php]

Appendices

Table S1. Clinical characteristics of asthmatic patients with high serum levels of LTE4

|  | Serum group 1  (n=69) | Serum group 2  (n=68) | *P* value | AERD  *P* value | ATA  *P* value |
| --- | --- | --- | --- | --- | --- |
| Age (yr) | 46.46± 13.51 | 53.93± 15.19 | 0.003 | 0.156 | 0.009 |
| Sex (Female) | 48 (69.6%) | 41 (60.3%) | 0.255 | 0.464 | 0.384 |
| Atopy | 40 (60.6%) | 39 (57.4%) | 0.702 | 0.717 | 0.499 |
| Total IgE (KU/L) | 304.92± 312.58 | 387.76± 537.69 | 0.282 | 0.631 | 0.171 |
| Sputum eosinophil (%) | 32.81± 32.50 | 18.96± 32.10 | 0.050 | 0.292 | 0.118 |
| Blood eosinophil count (/µL) | 400.73± 259.35 | 223.53± 190.14 | <0.001 | 0.001 | 0.004 |
| Blood eosinophil (%) | 6.40± 4.85 | 3.61± 2.73 | <0.001 | 0.001 | 0.012 |
| FeNO (ppb) | 40.02± 32.24 | 28.43± 30.65 | 0.036 | 0.511 | 0.020 |
| FEV1(%Pred) | 87.94± 18.87 | 93.09± 16.23 | 0.091 | 0.006 | 0.966 |
| FVC (%Pred) | 90.14± 16.31 | 91.59± 13.50 | 0.574 | 0.015 | 0.258 |
| FEV1/FVC | 81.70± 8.74 | 84.42± 8.43 | 0.067 | 0.150 | 0.233 |
| MMEF (%Pred) | 68.31± 29.01 | 75.47± 27.20 | 0.140 | 0.016 | 0.842 |
| PC20 of methacholine (mg/mL) | 6.01± 7.82 | 6.95± 8.42 | 0.545 | 0.838 | 0.318 |
| Severe asthma | 11 (15.9%) | 13 (19.1%) | 0.625 | 0.764 | 0.396 |
| Uncontrolled asthma | 9 (13.0%) | 8 (11.8%) | 0.820 | 0.090 | 0.334 |

*AERD*, aspirin-exacerbated respiratory disease; *ATA*, aspirin tolerant asthma; *FeNO*, fractional exhaled nitric oxide; *FEV1*, forced expiratory volume in 1 second; *FVC*, forced Vital Capacity; *MMEF*, maximum midexpiratory flow; *PC20*, provocative concentration causing 20% fall in FEV1. Serum group 1: Asthmatics whose levels of serum LTE4 were the same or higher than median value (0.08991 ng/ml), Serum group 2: Asthmatics whose levels of serum LTE4 were lower than median value (0.08991 ng/ml), Data were analyzed by Student’s *t* test and Pearson’s chi-Squared test.

Table S2. Clinical characteristics of asthmatic patients with high urine levels of LTE4

|  | Urine group 1  (n=69) | Urine group 2  (n=68) | *P* value | AERD  *P* value | ATA  *P* value |
| --- | --- | --- | --- | --- | --- |
| Age (yr) | 53.06± 12.58 | 47.24± 16.36 | 0.022 | 0.514 | 0.024 |
| Sex (Female) | 48 (69.6%) | 41 (46.1%) | 0.255 | 0.587 | 0.192 |
| Atopy | 40 (60.6%) | 39 (57.4%) | 0.702 | 0.220 | 0.259 |
| Total IgE (KU/L) | 354.59± 483.18 | 338.09± 395.85 | 0.830 | 0.557 | 0.693 |
| Sputum eosinophil (%) | 32.23± 34.46 | 19.21± 30.16 | 0.066 | 0.240 | 0.014 |
| Blood eosinophil count (/µL) | 397.97± 254.82 | 226.32± 198.76 | <0.001 | 0.036 | 0.032 |
| Blood eosinophil (%) | 6.15± 4.90 | 3.87± 2.88 | 0.001 | 0.020 | 0.028 |
| FeNO (ppb) | 38.15± 33.00 | 30.72± 30.59 | 0.180 | 0.145 | 0.306 |
| FEV1(%Pred) | 88.91± 19.18 | 92.04± 16.17 | 0.305 | 0.849 | 0.604 |
| FVC(%Pred) | 89.49± 15.16 | 92.22± 14.73 | 0.289 | 0.453 | 0.603 |
| FEV1/FVC | 82.14± 8.52 | 83.94± 8.77 | 0.227 | 0.550 | 0.456 |
| MMEF (%Pred) | 69.47± 29.06 | 74.20± 27.44 | 0.331 | 0.630 | 0.401 |
| PC 20 of methacholine (mg/mL) | 5.14± 7.06 | 7.66± 8.80 | 0.101 | 0.303 | 0.906 |
| Severe asthma | 11 (15.9%) | 13 (19.1%) | 0.625 | 0.659 | 0.048 |
| Uncontrolled asthma | 9 (13.0%) | 8 (11.8%) | 0.820 | 0.413 | 0.108 |

*AERD*, aspirin-exacerbated respiratory disease; *ATA*, aspirin tolerant asthma; *FeNO*, fractional exhaled nitric oxide; *FEV1*, forced expiratory volume in 1 second; *FVC*, forced Vital Capacity; *MMEF*, maximum midexpiratory flow; *PC20*, provocative concentration causing 20% fall in FEV1. Urine group 1: Asthmatics whose levels of urine LTE4 were the same or higher than median value (108.24 pg/mg cr), Urine group 2: Asthmatics whose levels of urine LTE4 were lower than median value (108.24 pg/mg cr), Data were analyzed by Student’s *t* test and Pearson Chi-Square test.

Table S3. Factors affecting the serum levels of LTE4

|  | B | Std. Error | *P* value | Exp(B) | 95% Wald Confidence Interval  for Exp(B) | |
| --- | --- | --- | --- | --- | --- | --- |
|  | Lower | Upper |
| Aspirin sensitivity | -0.005 | 0.0389 | 0.897 | 0.995 | 0.922 | 1.074 |
| Presence of rhinosinusitis | 0.067 | 0.0389 | 0.084000 | 1.070000 | 0.991000 | 1.154000 |
| Blood eosinophil count (/µL) | 0.000336 | 7.44E-05 | <0.001 | 1.000336 | 1.00019 | 1.000481 |
| FeNO (ppb) | 0.001 | 0.0005 | 0.07 | 1.001 | 1 | 1.002 |
| Sex | -0.031 | 0.035 | 0.142 | 1.112 | 0.965 | 1.281 |
| Age | -0.003 | 0.0012 | 0.013 | 0.997 | 0.995 | 0.999 |
| Asthma control status | 0.045 | 0.0346 | 0.190000 | 1.046000 | 0.978000 | 1.120000 |

*LT*, leukotriene. General linear regression analysis was performed.

Table S4. Factors affecting the urine levels of LTE4

|  | B | Std. Error | *P* value | Exp(B) | 95% Wald Confidence Interval  for Exp (B) | |
| --- | --- | --- | --- | --- | --- | --- |
|  | Lower | Upper |
| Aspirin sensitivity | 257.246 | 98.5944 | 0.009 | 5.26E+111 | 6.26E+27 | 4.41E+195 |
| Presence of rhinosinusitis | 83.272 | 97.8114 | 0.395 | 1.46E+36 | 8.08E-48 | 2.64E+119 |
| Blood eosinophil count (/µL) | 0.674 | 0.1868 | <0.001 | 1.961 | 1.36 | 2.829 |
| FeNO (ppb) | 4.444 | 1.3704 | 0.001 | 85.094 | 5.799 | 1248.603 |
| Sex | 105.608 | 87.9997 | 0.23 | 7.33E+45 | 9.11E-30 | 5.90E+120 |
| Age | 2.901 | 2.9568 | 0.326 | 18.2 | 0.055 | 5982.756 |
| Asthma control status | 153.18 | 86.8316 | 0.078 | 3.35E+66 | 4.11E-08 | 2.73E+140 |

*LT*, leukotriene. General linear regression analysis was performed.

**

**

**Figure S1.** Receiver operating characteristic curves of LTE4 and LTE4/PGF2α ratio discriminating patients with AERD from those with ATA. (A) serum LTE4 (*P* = 0.470), (B) serum LTE4/PGF2α ratio (*P* = 0.054), (C) urine LTE4 (*P*<0.001, AUC=0.746), (D) urine LTE4/PGF2α ratio (*P*<0.001, AUC=0.747).

*AERD*, aspirin-exacerbated respiratory disease; *ATA*, aspirin tolerant asthma; *LT*, leukotriene; *PG*, prostaglandin.

**

**

**Figure S2.** Correlation of serum and urine levels with (A) LTE4, (B) TXB2 or (C) PGF2α.

*AERD*, aspirin-exacerbated respiratory disease; *ATA*, aspirin tolerant asthma; *LT*, leukotriene; *TXB*2, 11-dehydro thromboxane B2; *PG*, prostaglandin. *P* values were obtained by Pearson’s correlation test.

**
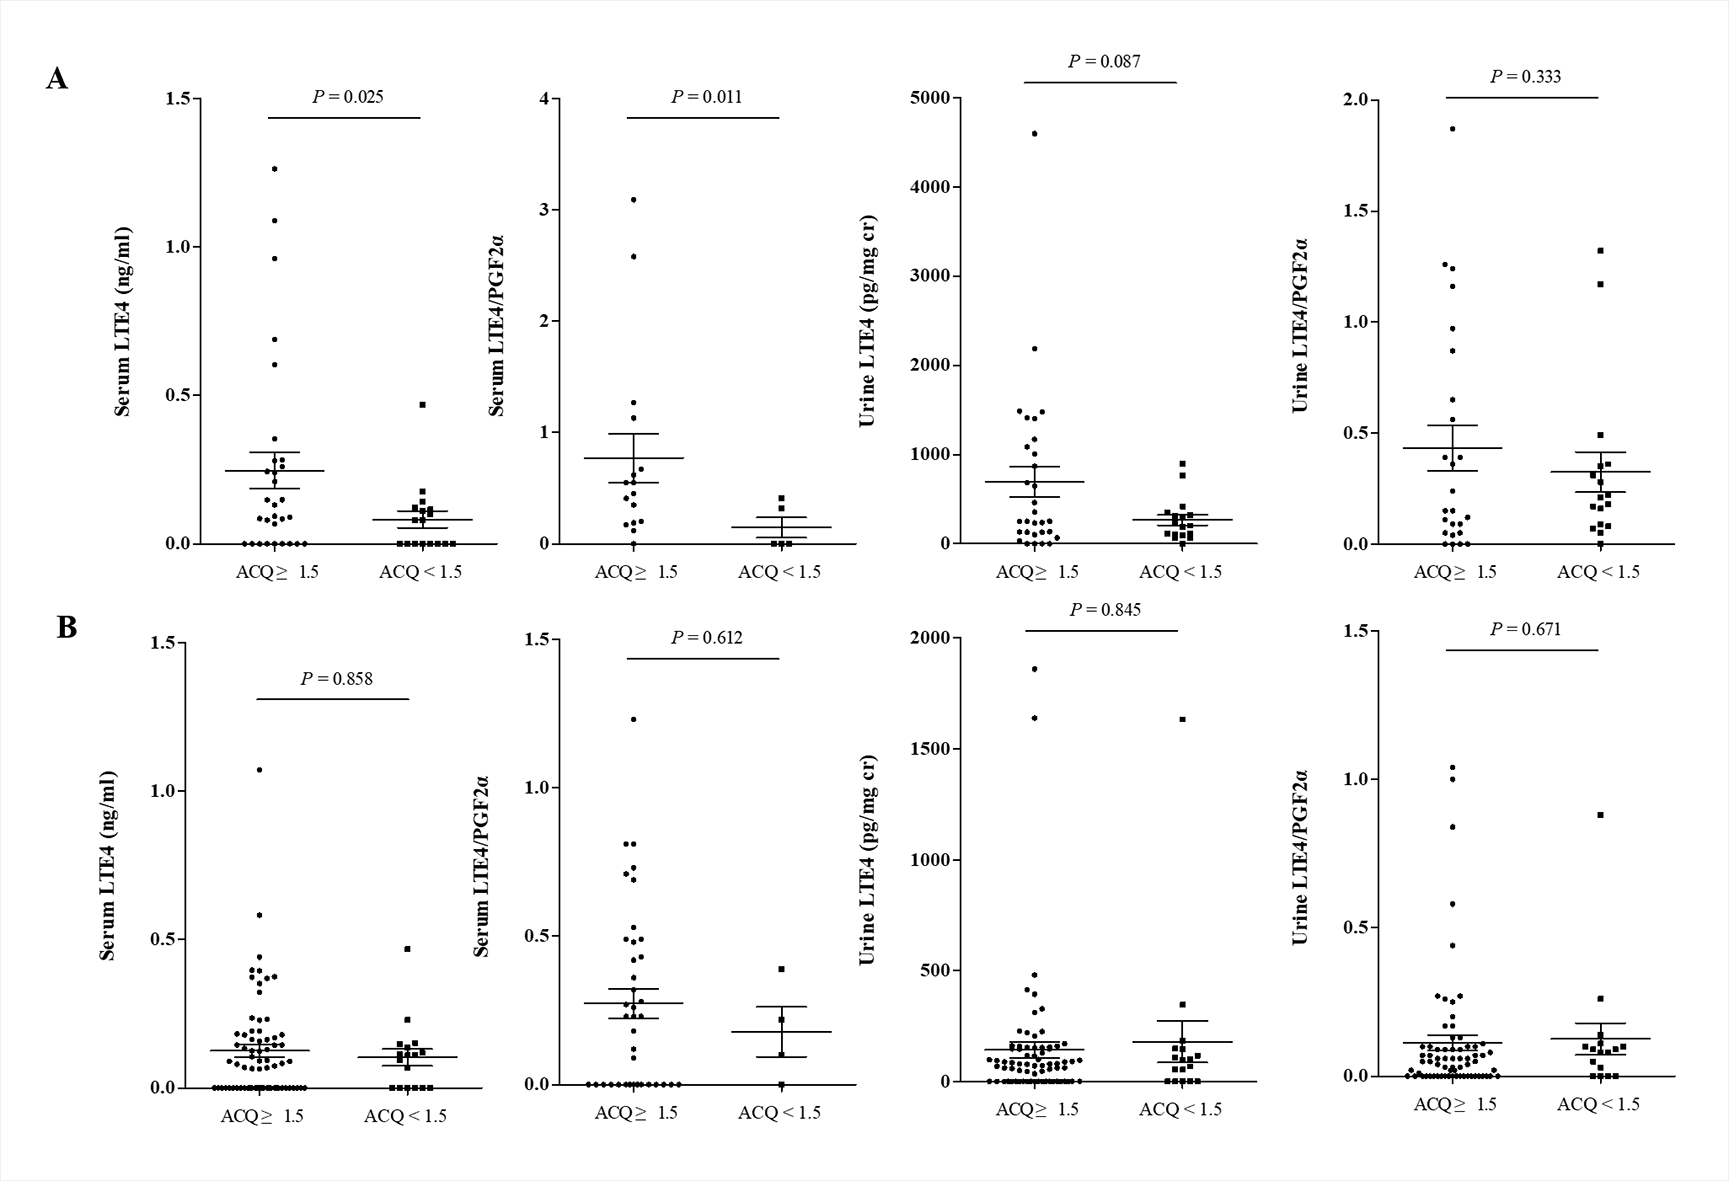
**

**Figure S3.** The serum and urine levels of LTE4 and LTE4/PGF2α ratio according to the ACQ score in patients with AERD (A) and those with ATA (B).

*AERD*, aspirin-exacerbated respiratory disease; *ATA*, aspirin tolerant asthma; *LT*, leukotriene; *PG*, prostaglandin; *ACQ*, asthma control questionnaire.
